# Supplementary material for: Molecular detection of Rickettsia spp. in ticks (Ixodida: Argasidae and Ixodidae) and mites (Trombiculoidae) from a brazilian taxonomic collection
Source: Research Square preprint supplement (doi:10.21203/rs.3.rs-8190507/v1), 2025-12-01
Supplement: Supplementary file 1 [file 2ec02f1a7d72eaf0f0874c0f.docx]

**Table S1**.

| Sampling data | Voucher | Stage/sex | Host or substrate | Coordinates | | GenBank Acession # | | |
| --- | --- | --- | --- | --- | --- | --- | --- | --- |
| Lat. | Log | 16S | COI | gltA |
| Family Argasidae Koch, 1844 | | | | | | | | |
| *Ornithodoros cavernicolous* Dantas-Torres, Venzal & Labruna, 2012 | | | | | | | | |
| Cave Gruta da Chácara, PESNT, Rio Pardo de Minas, MG, 20.Dec.2021 | 220211 | L | *G. soricina* | -15.6758 | -42.7295 | AC3296 | AC3296 | – |
| Cave Lapa Grande, PELG, Montes Claros, MG,14 Dec. 2021 | 221254 | L | *M. bennetti* | -16.7067 | -43.9549 | NA | AC3295 | – |
| Cave HCM 41, Pedro Leopoldo, MG, 09 – 08 Nov. 2016 | 172073 | ♀ | *CS,T* | -19.5750 | -44.0198 | NA | AC3165 | – |
| Cave HCM-0041, Pedro Leopoldo, MG, 08 Jul. 2017 | 172886 | ♂ | *CS,E* | -19.5750 | -44.0199 | NA | AC3166 | – |
| *Ornithodoros fonsecai* (Labruna & Venzal, 2009) | | | | | | | | |
| Cave Lapa das Pacas, PES, Lagoa santa, MG, 12 Aug. 2021 | 210291 | ♀ | CS,A | -19.5607 | -43.9605 | AC3268 | NA | PX584454 |
| Cave HOLC-0102, Pedro Leopoldo, MG, 21 Nov. – 02 Dec. 2016 | 171497 | N | CS,E | -19.5978 | -44.0190 | AC2002 | AC2002 | – |
| Cave HOLC-0102, Pedro Leopoldo, MG, 02–14.Jun.2016 | 171498 | ♀ | CS,T | -19.5978 | -44.0191 | AC2003 | NA | PX584457 |
| Cave HOLC-097/90, Pedro Leopoldo, MG, 27 Jun. – 01 Jul. 2016 | 171470 | ♂ | CS | -19.6029 | -44.0120 | AC1998 | NA | – |
| Cave Baixada das Crioulas, Itambé do Mato Dentro, MG, 23 – 24 Sep. 2015 | 160867 | ♀ | CS,T | -19.4075 | -43.3575 | AC3068 | NA | PX584456 |
| Cave Lapa Sem Fim, Luizlândia, MG, 10 – 27 Apr. 2015 | 160197 | ♀ | CS | -16.1489 | -44.6275 | AC2013 | NA | – |
| Cave Lapa Sem Fim, Luizlândia, MG, 10 – 27 Apr. 2015 | 160298 | ♀ | CS | -16.1489 | -44.6275 | AC2021 | NA | – |
| Cave Lapa Sem Fim, Luizlândia, MG, 10 – 27 Apr. 2015 | 160303 | N | CS | -16.1489 | -44.6275 | AC2022 | NA | – |
| Cave Lapa Sem Fim, Luizlândia, MG, 10 – 27 Apr. 2015 | 160307 | N | CS | -16.1489 | -44.6275 | AC2024 | NA | – |
| Cave Lapa Sem Fim, Luizlândia, MG, 10 – 27 Apr. 2015 | 160312 | ♀ | CS | -16.1489 | -44.6275 | AC2025 | NA | – |
| Cave Lapa Sem Fim, Luizlândia, MG, 10 – 27 Apr. 2015 | 160313 | N | CS | -16.1489 | -44.6275 | AC2026 | NA | – |
| Cave MTD-09, Ribeira, SP, 08-20 Mar. 2016 | 172233 | ♂ | CS,T | -24.6388 | -48.9621 | NA | AC1957 | – |
| Cave MTD-09, Ribeira, SP, 08-20 Mar. 2016 | 172234 | ♀ | CS,T | -24.6388 | -48.9621 | NA | AC1958 | PX584456 |
| Clade *Ornithodoros saraivai* Muñoz-Leal & Labruna, 2017 | | | | | | | | |
| Cave PDR-0073, Congonhas, MG, 18 – 20 Sep. 2018 | 180183 | N | CS, E | -20.4692 | -43.9032 | AC1937 | NA | – |
| Cave VL 14, Itabirito, MG, 09 – 15 Mar. 2017 | 171662 | ♀ | CS | -20.2946 | -43.9467 | AC2008 | NA | + |
| Cave CSS-0098, Conceição do Mato Dentro, MG, 22 Nov. – 15 Dec. 2016 | 170467 | ♀ | CS | -18.9419 | -43.4100 | AC1952 | NA | PX584455 |
| Cave SPT-0051, Conceição do Mato Dentro, MG, 26 Jun. – 13.Oct. 2016 | 170067 | N | CS,T | -19.1675 | -43.2739 | AC1948 | AC1948 | – |
| Cave SPT-0051, Conceição do Mato Dentro, MG, 16 – 26 Jan. 2017 | 170174 | ♀ | CS, E | -19.1675 | -43.2739 | AC1950 | AC1950 | – |
| Cave RM-33, Nova Lima, MG, 12 Jan. 2021 | 210050 | ? | CS | -20.0349 | -43.9946 | AC3249 | NA | + |
| Cave SPT-0444, Conceição do Mato Dentro, MG, 16 – 26 Jan.2017 | 170243 | ♂ | CS, E | -19.2150 | -43.3825 | NA | AC1951 | – |
| *Ornithodoros* sp. 2 (*O. yumatensis* + O. brodyiclade) | | | | | | | | |
| Cave CP-0004, Santa Maria de Itabira, MG, 17 Aug. 2018 | 180276 | N | CS, E | -19.3264 | -43.3123 | AC3221 | NA | PX584452 |
| *Ornithodoros* sp. 3 (*Ornithodoros* sp. Ubajara) | | | | | | | | |
| Cave HOLC-0063, Pedro Leopoldo, MG, 22 Jul. – 18 Aug. 2015 | 151049 | N | CS | -19.5711 | -44.0139 | AC1932 | AC1932 | – |
| Cave Lapa do sumidouro, PES, Lagoa santa, MG, 10 Aug. 2021 | 220034 | N | *D. rotundus* | -19.5418 | -43.9411 | AC3292 | AC3292 | – |
| Cave Lapa do sumidouro, PES, Lagoa santa, MG, 16 Dec. 2020 | 210097 | N | *G. soricina* | -19.5418 | -43.9411 | AC3251 | AC3251 | – |
| Cave HOLC-0021, Pedro Leopoldo, MG, 22 Jul. – 18 Aug. 2015 | 151043 | N | CS | -19.5708 | -44.0094 | AC1929 | NA | – |
| Cave HOLC-0021, Pedro Leopoldo, MG, 04 – 20 Mar. 2015 | 151045 | ♀ | CS | -19.5708 | -44.0094 | AC1931 | NA | – |
| Cave HOLC-157, Pedro Leopoldo, MG, 14 Jun. 2016 | 171343 | N | CS, E | -19.5715 | -44.0116 | NA | AC1984 | – |
| Cave HOLC-0139, Pedro Leopoldo, MG, 21 Nov. – 02 Dec. 2016 | 171333 | ♀ | CS,T | -19.5816 | -44.0198 | NA | AC1987 | PX584458 |
| Cave HOLC-0138, Pedro Leopoldo, MG, 02 – 14 Jun. 2016 | 171293 | N | CS,T | -19.5816 | -44.0198 | NA | AC1989 | – |
| Cave HOLC-0046, Pedro Leopoldo, MG, 04 – 20 Mar. 2015 | 151051 | N | CS | -19.5803 | -44.0183 | NA | AC1933 | – |
| Cave HOLC-0021, Pedro Leopoldo, MG, 22 Jul. – 18 Aug. 2015 | 151052 | N | CS | -19.5708 | -44.0094 | NA | AC1935 | – |
| Cave HOLC-0046, Pedro Leopoldo, MG, 04 – 20 Mar. 2015 | 151511 | N | CS | -19.5803 | -44.0183 | AC1934 | NA | – |
| *Ornithodoros* sp. 4 | | | | | | | | |
| Cave PA-08, Janaúba, MG, Brazil, 08 Fev. 2017 | 173020 | ♂ | CS,T | -15.7244 | -43.4410 | NA | AC1967 | – |
| Cave PA-08, Janaúba, MG, Brazil, 08 Fev. 2017 | 173021 | N | CS,T | -15.7244 | -43.4410 | NA | AC1968 | PX584459 |
| Family Ixodidae Koch, 1844 | | | | | | | | |
| *Amblyomma nodosum* Neumann, 1899 | | | | | | | | |
| Cave CSS-0099, Conceição do Mato Dentro, MG, 31 May – 12 Jun. 2016 | 170385 | ♀ | CS, E | -18.9450 | -43.4056 | PX529393 | AC1983 | – |
| *Amblyomma dubitatum* Neumann 1899 | | | | | | | | |
| Cave SPT-0583, Conceição do Mato Dentro, MG, 16 – 26 Jan. 2017 | 170244 | ♀ | CS | -19.1731 | -43.2644 | NA | AC1985 | PX584451 |
| *Amblyomma brasiliense* Aragão, 1908 | | | | | | | | |
| Cave GAND-127, Rio Acima, MG, 14 Jul. – 18 Sep. 2016 | 170577 | N | CS, T | -20.0530 | -43.6614 | PX529394 | AC1953 | – |
| Cave GAND-110, Rio Acima, MG, 14 Jul. – 18 Sep. 2016 | 171024 | N | CS | -20.0670 | -43.6694 | PX529395 | NA | – |
| Cave SPT-0154, Conceição do Mato Dentro, MG, 26 Jun. – 13 Oct. 2016 | 170057 | N | CS | -19.1644 | -43.2781 | NA | AC1975 | – |
| *Amblyomma pacae* Aragão, 1911 | | | | | | | | |
| Cave SPT-0585, Conceição do Mato Dentro, MG, 16 – 26 Jan. 2017 | 170231 | ♀ | CS | -19.1744 | -43.2647 | PX529396 | NA | – |
| *Amblyomma ovale* Koch, 1844 | | | | | | | | |
| Cave HOLC-00103, Pedro Leopoldo, MG, 21 Nov. – 02 Dec. 2016 | 171496 | ♀ | CS, E | -19.6800 | -44.0109 | PX529397 | AC2001 | – |
| Cave HOLC-0040, Pedro Leopoldo, MG, 22 Jul. – 18 Aug. 2015 | 151044 | ♀ | CS | -19.5714 | -44.0142 | PX529398 | NA | – |
| Cave MTD-12, Ribeira, SP, 08 – 20 Mar. 2016 | 172253 | ♀ | CS, T | -24.6433 | -48.9589 | NA | AC1970 | – |
| *Amblyomma sculptum* Berlese, 1888 | | | | | | | | |
| Cave SPT-0161, Conceição do Mato Dentro, MG, 26 Jul. – 13 Oct. 2016 | 170064 | N | CS, E | -19.1608 | -43.2775 | PX529399 | AC1972 | – |
| Cave MTD-0008, Mariana, MG, Brazil, 11-13.IX.2018 | 174546 | N | CS, E | -20,1668 | -43,3856 | PX529400 | NA | – |
| Cave HOLC-0118, Pedro Leopoldo, MG, 04 – 20 Mar. 2015 | 151038 | ♀ | CS | -19.5769 | -44.0206 | PX529401 | NA | – |
| Cave SPT-0245, Conceição do Mato Dentro, MG, 26 Jul. – 05 Aug. 2016 | 170483 | N | CS | -19.0914 | -43.3625 | PX529402 | NA | – |
| Cave CCB-0052, Mariana, MG, 11-13 Sep. 2018 | 174549 | ♀ | CS, T | -20.1664 | -43.3833 | PX529403 | AC1947 | – |
| Cave SPT-0270, Conceição do Mato Dentro, MG, 29 Nov. – 16 Dec. 2016 | 170055 | ♀ | CS, E | -19.0867 | -47.1644 | PX529404 | NA | – |
| Cave SPT-0503, Conceição do Mato Dentro, MG, 10 – 15 Jan. 2017 | 171576 |  | CS | -19.2185 | -43.3862 | NA | AC2010 | – |
| Cave SPT-0233, Conceição do Mato Dentro, MG, 26 Jul. – 13 Oct. 2016 | 170507 | N | CS, E | -19.0919 | -43.3689 | PX529405 | NA | – |
| *Amblyomma cajennense* Fabricius, 1787 | | | | | | | | |
| Cave PS-00015, Marabá, PA, 01 Aug. 2018 | 180090 | ♀ | CS, E | -5.7884 | -50.4988 | PX529406 | NA | – |

**Table S2**.

| Sampling data | Voucher | Stage/sex | Host or substrate | Coordinates | | GenBank Acession # | | |
| --- | --- | --- | --- | --- | --- | --- | --- | --- |
| Lat. | Log | 28S rDNA | COI | gltA |
| *Whartonia pachywhartoni* Vercammen-Grandjean, 1966 | | | | | | | | |
| PESRM, Belo Horizonte, MG, 02 Jun. 2013 | 1300432 | L | *C. perspicillata* | -20.0347 | -43.9945 | NA | ON145636 | + |
| Cave CSS 15, Conceição do Mato Dentro, MG, 26 – 29 Jun. 2016 | 160177 | ♀ | CS, T. | -18.9106 | -43.4286 | NA | ON145625 | – |
| Cave Lapa Sem Fim, Luizlândia, MG, 10 – 27 Apr. 2015 | 160212 | ♀ | CS | -16.1489 | -44.6275 | ON146225 | ON145627 | – |
| Cave SPT-0490, Conceição do Mato Dentro, MG, 26 Jul. – 13 Oct. 2016 | 161056 | ♀ | CS | -19.2183 | -43.3864 | NA | ON145648 |  |
| Cave SPT-0081, Serpentina Ridge, Conceição do Mato Dentro, MG, 26 Jun. – 13 Oct. 2016 | 170002 | DN | CS, A. | -19.1664 | -43.2711 | NA | ON145637 | + |
| Cave SPT-0081, Serpentina Ridge, Conceição do Mato Dentro, MG, 26 Jun. – 13 Oct. 2016 | 170018 | ♀ | CS | -19.2214 | -43.3903 | NA | ON145654 | – |
| Cave SPT-0585, Serpentina Ridge, Conceição do Mato Dentro, MG 16 – 26 Jan. 2017 | 170228 | ♂ | CS | -19.1744 | -43.2647 | NA | ON145642 | PX584469 |
| Cave SPT-0585, Serpentina Ridge, Conceição do Mato Dentro, MG 16 – 26 Jan. 2017 | 170230 | ♀ | CS | -19.1744 | -43.2647 | NA | ON145670 | – |
| Cave SPT-0316, Serpentina Ridge, Conceição do Mato Dentro, MG 16 – 26 Jan. 2017 | 170255 | ♂ | CS, A | -19.2214 | -43.3903 | NA | ON145653 | PX584470 |
| Cave SPT-0160, Serpentina Ridge, Conceição do Mato Dentro, MG 16 – 26 Jan. 2017 | 170258 | ♀ | CS, A | -19.1647 | -43.2789 | NA | ON145652 | – |
| Cave SPT-0151, Serpentina Ridge, Conceição do Mato Dentro, MG, 29 Nov. – 16 Dec. 2016 | 170270 | ♀ | CS | -19.0925 | -43.3644 | NA | ON145641 | – |
| Cave SPT-0131, Serpentina Ridge, Conceição do Mato Dentro, MG, 16 – 26 Jan. 2017 | 170281 | ♀ | CS, A | -19.0850 | -47.1669 | NA | ON145645 | – |
| Cave SPT-0316, S. Serpentina, Conceição do Mato Dentro, MG, 16 – 26 Jan. 2017 | 170288 | ♀ | CS, A | -19.2214 | -43.3903 | NA | ON145628 | – |
| Cave SPT-0316, S. Serpentina, Conceição do Mato Dentro, MG, 16 – 26 Jan. 2017 | 170289 | ♂ | CS, A | -19.2214 | -43.3903 | NA | ON145651 | – |
| Cave SPT-0316, S. Serpentina, Conceição do Mato Dentro, MG, 16 – 26 Jan. 2017 | 170291 | ♂ | CS, T. | -19.2214 | -43.3903 | ON146214 | ON145650 | PX584471 |
| Cave SPT-0585, S. Serpentina, Conceição do Mato Dentro, MG, 16 – 26 Jan. 2017 | 170325 | ♂ | CS | -19.1744 | -43.2647 | NA | ON145640 | – |
| Cave SPT-0585, S. Serpentina, Conceição do Mato Dentro, MG, 16 – 26 Jan. 2017 | 170326 | DN | CS | -19.1744 | -43.2647 | NA | ON145638 | – |
| Cave MCFIN-0005, Itambé do Mato Dentro, MG, 26 Jun. – 06 Jul. 2018 | 180252 | ♂ | CS, A | -19.3318 | -43.3076 | NA | ON145644 | – |
| Cave MGB-0063, Ouro Preto, MG, 03 – 06 Nov. 2018 | 180490 |  | CS, A | -20.4437 | -43.7654 | NA | ON145626 | + |
| Cave Simmons, São Gonçalo do Rio Abaixo, MG, Oct. 2016 | 210081 | ♀ | CS | -19.8986 | -43.4728 | NA | ON145647 | – |
| Cave Nadinho, Pains, MG, 11 Aug. 2020 | 210157 | L | *D. rotundus* | -20.3678 | 45.6573 | ON146215 | ON145657 | – |
| Cave Coruja, Doresópolis, MG, 05 Aug. 2020 | 210161 | L | *D. rotundus* | -20.2938 | -45.8539 | ON146220 | ON145630 | – |
| Cave Brega, Pains, MG, 03 Aug. 2020 | 210162 | L | *C. perspicillata* | -20.4174 | -45.7718 | ON146212 | ON145656 | – |
| Cave Olhos d'água, Pains, MG, 13 Mai. 2020 | 210173 | L | *S. lilium* | -20.3116 | -45.6847 | ON146226 | ON145635 | – |
| Cave Olhos d'água, Pains, MG, 13 Mai. 2020 | 210174 | L | *P. lineatus* | -20.3116 | -45.6847 | ON146213 | ON145646 | + |
| Cave Paca, Formiga, MG, 05 Sep. 2020 | 210180 | L | *D. ecaudata* | -20.4743 | -45.6595 | ON146216 | ON145629 | PX584462 |
| Cave Paca, Formiga, MG, 05 Sep. 2020 | 210190 | L | *A. caudifer* | -20.4743 | -45.6595 | ON146224 | ON145658 | + |
| Cave Paca, Formiga, MG, 04 Jan. 2020 | 210194 | L | *D. ecaudata* | -20.4743 | -45.6595 | ON146217 | ON145660 | – |
| Gruta Olhos d'água, Pains, MG, 31 Mar. 2020 | 210195 | L | *C. perspicillata* | -20.3116 | -45.6847 | ON146227 | ON145659 | + |
| Cave Paca, Formiga, MG, 05 Sep. 2020 | 210232 | L | *C. perspicillata* | -20.4743 | -45.6595 | ON146221 | ON145661 | + |
| Cave Paca, Formiga, MG, 05 Sep. 2020 | 210241 | L | *M. bennettii* | -20.4743 | -45.6595 | ON146222 | ON145662 | – |
| Cave Coruja, Doresópolis, MG, 05 Mai. 2020 | 210243 | L | *D. rotundus* | -20.2934 | -45.8535 | NA | ON145663 | – |
| Cave Coruja, Doresópolis, MG, 05 Mai. 2020 | 210244 | L | *D. rotundus* | -20.2934 | -45.8535 | NA | ON145664 | – |
| Cave Coruja, Doresópolis, MG, 05 Mai. 2020 | 210246 | L | *D. rotundus* | -20.2934 | -45.8535 | ON146223 | ON145665 | – |
| Cave Paca, Formiga, MG, 04 Jan. 2020 | 210248 | L | *D. ecaudata* | -20.4743 | -45.6595 | ON146218 | ON145666 | – |
| Cave RM-38, PESRM, Nova Lima, MG, 14 Jan. 2021 | 210251 | ♀ | CS, A | -20.0135 | -43.9787 | NA | ON145631 | – |
| Cave SPT-0131, S. Serpentina, Conceição do Mato Dentro, MG, 16–26 Jan. 2017 | 170297 | ♂ | CS, T | -19.0907 | -43.3654 | NA | ON145633 | PX584468 |
| PES, Lagoa Santa, MG, 16 Dec. 2020 | 210101 | L | *M. bennetti* | -19.5418 | -43.9411 | AC2451 | NA | PX584463 |
| Cave Gruta do Brega, Pains, MG, 08 Mar. 2020 | 210163 | L | *C. perspicillata* | -20.4174 | -45.7718 | AC2426 | NA | PX584460 |
| Cave Gruta do Brega, Pains, MG, 08 Mar. 2020 | 210170 | L | *C. perspicillata* | -20.4174 | -45.7718 | NA | PX532403 | PX584461 |
| Cave RM 33, PERM, Nova Lima, MG, 24 Aug. 2021 | 210337 | L | CS | -20.0350 | -43.9947 | AC2494 | NA | PX584464 |
| Cave RM 33, PERM, Nova Lima, MG, 24 Aug. 2021 | 210339 | L | CS | -20.0350 | -43.9947 | AC2496 | NA | PX584465 |
| Cave RM 33, PERM, Nova Lima, MG, 24 Aug. 2021 | 210340 | L | CS | -20.0350 | -43.9947 | AC2497 | NA | PX584466 |
| Cave RM 33, PERM, Nova Lima, MG, 24 Aug. 2021 | 210341 | L | CS | -20.0350 | -43.9947 | NA | NA | PX584467 |
| *Whartonia nudosetosa* (Wharton, 1938) | | | | | | | | |
| Cave GEM-1614, Canaã dos Carajás, PA 19 – 24 Nov. 2014 | 160070 | DN | CS | -6.4561 | -50.2419 | – | ON145620 | – |
| Cave GEM-1614, Canaã dos Carajás, PA, 06 – 19 Nov. 2015 | 160193 | ♀ | CS | -6.4561 | -50.2419 | ON146207 | ON145621 | – |
| Cave Lapa Sem Fim, Luizlândia, MG, 10 – 27 Apr. 2015 | 160216 | ♀ | CS | -16.1489 | -44.6275 | ON146210 | ON145623 | – |
| Cave Lapa Sem Fim, Luizlândia, MG, 10 – 27 Apr. 2015 | 160219 | ♀ | CS | -16.1489 | -44.6275 | ON146209 | ON145622 | – |
| Cave SPT-0585, Serpentina Ridge, Conceição do Mato Dentro, MG 16 – 26 Jan. 2017 | 170263 | ♂ | CS, T | -19.2219 | -43.3953 | NA | ON145624 | – |
| Cave GEM-1614, Canaã dos Carajás, PA, 02 – 13 Mai. 2016 | 172125 |  | CS | -6.4560 | -50.2421 | NA | ON145655 | – |
| Cave Planaltina (Sitio Ecológico Raízes do Xingu), Brasil Novo, PA, 04 Apr. 2017 | 210082 |  | *P. trinitatis* | -3.3228 | -52.2747 | ON145667 | ON146208 | – |
| PES, Lagoa Santa, MG, 15 Dec. 2020 | 210084 |  | *G. soricina* | -19.5606 | -43.9667 | ON145669 | NA | – |

**Table S3**.

| **Terminal** | **GenBank** | **Reference** | **Host** | **Phenotype** |
| --- | --- | --- | --- | --- |
| Group Rhyzobius | | | | |
| *Rickettsia* from *Polydrusus tereticollis* | OZ032142 |  | Coleoptera: Curculionidae |  |
| *Rickettsia* from *Rhyzobius litura* | FJ666753 | Weinert et al 2009 | Coleoptera: Coccinellidae |  |
| Group Meloidae | | | | |
| *Rickettsia* from Meloidae | FJ666754 | Weinert et al 2009 | Coleoptera:Meloidae |  |
| Group Belli | | | | |
| *Rickettsia* from *Bemisia tabaci* | DQ077708 | Weinert et al 2009 | Hemiptera: Aleyrodidae |  |
| Rickettsia ALSK | KX254162 |  | *Xenopsylla minax* (Siphonaptera: Pulicidae) |  |
| *Rickettsia* from *Carica papaya* and *Empoasca papayae* | U76908 | Weinert et al 2009 | Hemiptera: Cicadellidae | plant pathogen |
| *Rickettsia* RDa420 | AF497584 |  | *Dermacentor auratus* (Ixodidae) from a bear |  |
| *Rickettsia* from Bombyliid bee fly | FJ666755 | Weinert et al 2009 | Diptera: Bombyliidae |  |
| *Rickettsia* from *Acyrthosiphon pisum* | FJ666756 | Weinert et al 2009 | Hemiptera: Aphididae |  |
| *Rickettsia* from Bombyliid bee fly | FJ666757 | Weinert et al 2009 | Diptera: Bombyliidae |  |
| *Rickettsia* from *Brachys tessellatus* | FJ666758 | Weinert et al 2009 | Coleoptera: Buprestidae | male-killing |
| *Rickettsia* from Chrysopid lacewing | FJ666759 | Weinert et al 2009 | Neuroptera: Chrysopidae |  |
| *Rickettsia bellii* | CP000849 | Weinert et al 2009 | *Dermacentor variabilis* (Ixodidae) | vertebrate pathogen |
| *Rickettsia bellii* | CP000087 | Weinert et al 2009 | *Dermacentor variabilis* (Ixodidae) | vertebrate pathogen |
| *Rickettsia bellii* | MG550957 |  | *Amblyomma rotundatum* (Ixodidae) | vertebrate pathogen |
| *Rickettsia* from Elaterid beetle | FJ666760 | Weinert et al 2009 | Coleoptera: Elateridae |  |
| *Rickettsia* from Noctuid moth | FJ666761 | Weinert et al 2009 | Lepdoptera: Noctuidae |  |
| Group Adalia | | | | |
| *Rickettsia* from *Subcoccinella vigintiquatuorpunctata* | FJ666762 | Weinert et al 2009 | Coleoptera: Coccinellidae |  |
| *Rickettsia* from *Adalia bipunctata* | FJ666765 | Weinert et al 2009 | Coleoptera: Coccinellidae |  |
| *Rickettsia* from *Adalia bipunctata* | FJ666764 | Weinert et al 2009 | Coleoptera: Coccinellidae |  |
| *Rickettsia* from *Adalia bipunctata* | FJ666763 | Weinert et al 2009 | Coleoptera: Coccinellidae |  |
| *Rickettsia* from *Adalia bipunctata* | U59712 | Roux et al 1997 | Coleoptera: Coccinellidae |  |
| *Rickettsia* from *Halyzia* | FJ666766 | Weinert et al 2009 | Coleoptera: Coccinellidae |  |
| *Rickettsia* from *Calvia quatuordecimguttata* | FJ666767 | Weinert et al 2009 | Coleoptera: Coccinellidae |  |
| *Rickettsia* from *Adalia decempunctata* | FJ666768 | Weinert et al 2009 | Coleoptera: Coccinellidae |  |
| Group Canadensis | | | | |
| *Rickettsia canadensis* | CP000409 | Weinert et al 2009 | Ixodida: Ixodidae | vertebrate pathogen |
| Candidatus Rickettsia tarasevichiae | AF503167 | Weinert et al 2009 | *Ixodes persulcatus* (Ixodida: Ixodidae) |  |
| Group Spotted Fever | | | | |
| *Rickettsi helvetica* | U59723 | Roux et al 1997 | *Ixodes ricinus* (Ixodida: Ixodidae) | vertebrate pathogen |
| *Rickettsia monacensis* | LN794217 |  |  |  |
| Uncultured *Rickettsia* sp. | MG906649 | Jacinavicius et al 2019 | *Herpetacarus* *hertigi*, *Quadraseta trapezoides,* *Trombewingia* *bakeri*.(Trombiculoidae) |  |
| Uncultured *Rickettsia* sp. | MG906658 | Bassini-Silva et al 2023 | *Eutrombicula tinami* (Trombiculoidae) |  |
| Uncultured *Rickettsia* sp. | MG906657 | Bassini-Silva et al 2023 | *Blankaartia sinnamaryi, Eutrombicula tinami* (Trombiculoidae) |  |
| *Rickettsi montana* | U74756 | Roux et al 1997 | *Microtus* sp. (Rodentia: Cricetidae) | vertebrate pathogen |
| *Rickettsi massiliae* | CP000683 | Weinert et al 2009 | Cells in culture | vertebrate pathogen |
| *Rickettsi japonica* | U59724 | Roux et al 1997 | Human | vertebrate pathogen |
| *Rickettsi peacockii* | HF935076 | Anstead and Chilton 2013 | *Ixodes angustus* (Ixodida: Ixodidae) |  |
| *Rickettsi rickettsii* | CP000848 | Weinert et al 2009 | Human | vertebrate pathogen |
| *Rickettsi conorii* | OP382371 | Xue et al 2023 | *Haemaphysalis concinna* (Ixodida: Ixodidae) | vertebrate pathogen |
| *Rickettsi sibirica* | MW802694 | Han et al. 2025 | *Rhipicephalus turanicus* (Ixodida: Ixodidae) | vertebrate pathogen |
| *Rickettsia slovaca* | CP002428 | Fournier et al 2012 | *Dermacentor* sp. (Ixodida: Ixodidae) | vertebrate pathogen |
| *Rickettsia amblyommatis* | CP012420 | Yen et al 2021 | *Amblyomma cajennense* (Ixodida: Ixodidae) | vertebrate pathogen |
| *Rickettsia* sp | MN581991 |  | *Rhipicephalus* sp.(Ixodida: Ixodidae) *Nesokia indica* (Rodentia: Muridae) |  |
| Candidatus *Rickettsia wissemanii* | LT558852 | Tahir et al 2016 | *Ornithodoros hasei* (Ixodida: Argasidae) *Noctilio albiventris* ( |  |
| *Rickettsia parkeri* AtlanticRainforest | CP040325 | Londoño et al 2019 | *Amblyomma ovale* (Ixodida: Ixodidae) | vertebrate pathogen |
| Candidatus *Rickettsia andeanae* | GU169051 | Jiang et al 2005 | *Ixodes boliviensis* (Ixodida: Ixodidae) |  |
| *Rickettsia rhipicephali* | CP003342 |  | *Rhipicephalus sanguineus* (Ixodida: Ixodidae) |  |
| *Rickettsia heilongjiangensis* | AY285776 | Shpynov et al 2006 | *Haemaphysalis concinna* (Ixodida: Ixodidae) | vertebrate pathogen |
| *Rickettsia africae* | HM050288 |  | *Rhipicephalus evertsi* (Ixodida: Ixodidae) |  |
| Group Typhus | | | | |
| *Rickettsi typhi* | U59714 | Roux et al 1997 | Human | vertebrate pathogen |
| *Rickettsi prowazekii* | U59715 |  | Human | vertebrate pathogen |
| Group Transitional | | | | |
| *Rickettsia australis* | U59718 | Roux et al 1997 | Human | vertebrate pathogen |
| *Rickettsia akari* | CP000847 | Weinert et al 2009 | Human | vertebrate pathogen |
| *Rickettsia* from *Aulogymnus trilineatus* | FJ666769 | Weinert et al 2009 | Hymenoptera: Eulophidae |  |
| *Rickettsia* from *Aulogymnus balani* | FJ666770 | Weinert et al 2009 | Hymenoptera: Eulophidae |  |
| *Rickettsia* from *Pediobius rotundatus* | FJ666771 | Weinert et al 2009 | Hymenoptera: Eulophidae |  |
| *Rickettsia* from *Coccidula rufa** | FJ666772 | Weinert et al 2009 | Coleoptera: Coccinellidae |  |
| *Rickettsia* *felis* | KP870108 |  | *Ctenocephalides felis*  (Siphonaptera: Pulicidae) | vertebrate pathogen |
| Candidatus Rickettsia senegalensis_P127 | MK548197 |  | *Ctenocephalides felis*  (Siphonaptera: Pulicidae) | vertebrate pathogen |
| *Rickettsia asembonensis* | MK031661 |  | *Ctenocephalides felis*  (Siphonaptera: Pulicidae) | vertebrate pathogen |
| *Rickettsia felis* (Arica) | JX402763 | Abarca et al 2013 | *Rhipicephalus sanguineus* (Ixodida: Ixodidae) | vertebrate pathogen |
| *Rickettsia* sp. | MG783574 | Bassini-Silva et al 2018 | *Blankaartia sinnamaryi* (Trombiculoidae) |  |
| *Rickettsia aeschilimannii* | KP675964 |  | *Hyalomma aegyptium* (Ixodida: Ixodidae) | vertebrate pathogen |
| Uncultured *Rickettsia* | MF175748 | Bitencourth et al 2017 | *Amblyomma sculptum* (Ixodida: Ixodidae) |  |

**Table S4**.

| **Terminal** | **16SrDNA** | **gltA** | **AtpA** | **CoxA** |
| --- | --- | --- | --- | --- |
| Group Rhyzobius | | | | |
| *Rhyzobius litura* | FJ609388 | FJ666753 | FJ666796 | FJ666774 |
| Group Meloidae | | | | |
| Meloidae | FJ609389 | FJ666754 | FJ666797 | FJ666775 |
| Group Belli | | | | |
| *Bemisia tabaci* | DQ077707 | DQ077708 | – | – |
| *C. papaya* and *E. papayae* | U76910 | U76908 | – | – |
| Bombyliid bee fly | FJ609390 | FJ666755 | FJ666798 | FJ666776 |
| *Acyrthosiphon pisum* | FJ609391 | FJ666756 | FJ666799 | FJ666777 |
| Bombyliid bee fly | FJ609392 | FJ666757 | FJ666800 | FJ666778 |
| *Brachys tessellatus* | FJ609393 | FJ666758 | FJ666801 | – |
| Chrysopid lacewing | FJ609395 | FJ666759 | – | FJ666780 |
| *Rickettsia bellii* | CP000849 | CP000849 | CP000849 | CP000849 |
| *Rickettsia bellii* | CP000087 | CP000087 | CP000087 | CP000087 |
| Elaterid beetle | FJ609396 | FJ666760 | FJ666802 | FJ666781 |
| Noctuid moth | FJ609397 | FJ666761 | FJ666803 | FJ666782 |
| Group Adalia | | | | |
| *Subcoccinella vigintiquatuorpunctata* | FJ609398 | FJ666762 | FJ666804 | FJ666783 |
| *Adalia bipunctata* | FJ609400 | FJ666765 | FJ666807 | FJ666787 |
| *Adalia bipunctata* | FJ609401 | FJ666764 | FJ666808 | FJ666786 |
| *Halyzia* | FJ609402 | FJ666766 | FJ666809 | FJ666788 |
| *Calvia quatuordecimguttata* | FJ609403 | FJ666767 | FJ666810 | FJ666789 |
| *Adalia decempunctata* | FJ609404 | FJ666768 | FJ666811 | FJ666790 |
| Group Canadensis | | | | |
| *Rickettsia canadensis* | CP000409 | CP000409 | CP000409 | CP000409 |
| Candidatus *Rickettsia tarasevichiae* | AF503168 | AF503167 | - | - |
| Group Spotted Fever | | | | |
| *Rickettsia helvetica* | OY974080 | OY974080 | OY974080 | OY974080 |
| *Rickettsia monacensis* | LN794217 | LN794217 | LN794217 | LN794217 |
| *Rickettsia montanensis* | CP003340 | CP003340 | CP003340 | CP003340 |
| *Rickettsia massiliae* | CP000683 | CP000683 | CP000683 | CP000683 |
| *Rickettsia japonica* | L36213 | U59724 | DQ821776 | - |
| *Rickettsia peacockii* | DQ062433 | DQ100162 | - | - |
| *Rickettsia rickettsii* | CP000848 | CP000848 | CP000848 | CP000848 |
| *Rickettsia conorii* | AE006914 | AE006914 | AE006914 | AE006914 |
| *Rickettsia sibirica* | KY780085 | KY780027 | - | - |
| *Rickettsia slovaca* | CP002428 | CP002428 | CP002428 | CP002428 |
| *Rickettsia amblyommatis* | CP012420 | CP012420 | CP012420 | CP012420 |
| Candidatus *Rickettsia wissemanii* | LT558851 | LT558852 | - | - |
| *Rickettsia parkeri* Atlantic Rainforest | CP040325 | CP040325 | CP040325 | CP040325 |
| *Rickettsia rhipicephali* | CP003342 | CP003342 | CP003342 | CP003342 |
| *Rickettsia heilongjiangensis* | CP002912 | CP002912 | CP002912 | CP002912 |
| *Rickettsia africae* | NC_012633 | NC_012633 | NC_012633 | NC_012633 |
| Group Typhus | | | | |
| *Rickettsia typhi* | AE017197 | AE017197 | AE017197 | – |
| *Rickettsi prowazekii* | NC_017560 | NC_017560 | NC_017560 | NC_017560 |
| Group  Transitional | | | | |
| *Rickettsia australis* | U17644 | U59718 | DQ821777 | – |
| *Rickettsia akari* | CP000847 | CP000847 | CP000847 | CP000847 |
| *Aulogymnus trilineatus* | FJ609405 | FJ666769 | FJ666812 | FJ666792 |
| *Aulogymnus balani* | FJ609406 | FJ666770 | FJ666813 | FJ666793 |
| *Pediobius rotundatus* | FJ609407 | FJ666771 | FJ666814 | FJ666794 |
| *Rickettsia* from *Coccidula rufa** | FJ609408 | FJ666772 | FJ666815 | FJ666795 |
| *Rickettsia* *felis* | CP000053 | CP000053 | CP000053 | CP000053 |
| Candidatus *Rickettsia senegalensis* | KF666476 | KF666472 | – | – |
| *Rickettsia asembonensis* | NZ_CP116496 | NZ_CP116496 | NZ_CP116496 | NZ_CP116496 |
| *Rickettsia felis* | OM912382 | OM936910 | – | – |
| *Rickettsia aeschilimannii* | KT318741 | KT318743 | – | – |
| Newly sequenced | | | | |
| *A. dubitatum* (UFMG AC 170244) | PX530379 | PX584451 | PX584473 | PX584480 |
| *O. aff saraivai* (UFMG AC 170467) | – | PX584455 | PX584479 | – |
| *O.* sp Ubajara (UFMG AC 171333) | – | PX584458 | PX584475 | PX584481 |
| *O. fonsecai* (UFMG AC 171498) | – | PX584457 | PX584478 | – |
| *O. fonsecai* (UFMG AC 172234) | – | PX584453 | PX584472 | – |
| *O.* sp2 (UFMG AC 180276) | – | PX584452 | PX584474 | – |
| *O. fonsecai* (UFMG AC 210291) | – | PX584454 | PX584477 | PX584482 |
| *W. pachywhartoni* (UFMG AC 210340) | PX530378 | PX584466 | PX584476 | – |
